# Supplementary material for: Au@PdAg core–shell nanotubes as advanced electrocatalysts for methanol electrooxidation in alkaline media
Source: Royal Society of Chemistry journal article supplement (doi:10.1039/c8ra08781d), 2019-01-01
Supplement: c8ra08781d1.pdf [file c8ra08781d1.pdf]

Supporting Information

**Au@PdAg core-shell nanotubules as advanced electrocatalysts for methanol electrooxidation in alkaline media**

Wenke Yang<sup>a</sup>, Qing Zhang<sup>a</sup>, Cheng Peng<sup>a,b,\*</sup>, Eyu Wu<sup>a</sup>, Shaowei Chen<sup>b,†</sup>, Yanyun Ma<sup>c</sup>, Yixiong

Zheng<sup>a</sup>, Jie Hou<sup>a</sup>, Yuexiao He<sup>a</sup>, Bangkai Zhang<sup>a</sup>, Lifei Deng<sup>a</sup>

<sup>a</sup> College of Materials Science and Engineering, Huaqiao University, Xiamen 361021, PR China

<sup>b</sup> Department of Chemistry and Biochemistry, University of California, 1156 High Street, Santa Cruz, California 95064, USA

<sup>c</sup> Institute of Functional Nano & Soft Materials (FUNSOM), Jiangsu Key Laboratory for Carbon-Based Functional Materials & Devices, Soochow University, 199 Ren'ai Road, Suzhou, 215123, Jiangsu, PR China

**Table 1. Summary of electrocatalytic performance of Au@PdAg-NTs and commercial Pd/C**

| Electrode      | $E_s$ (V) | $E_p$ (V) | $j_p$<br>(mA cm <sup>-2</sup> /<br>mA mg <sub>Pd</sub> <sup>-1</sup> ) | $E_a$<br>(KJ mol <sup>-1</sup> ) | $J_{t=1000s}$<br>(mA cm <sup>-2</sup> ) | Metal<br>loading/<br>mg <sub>Pd</sub> | ECSA/cm <sup>2</sup><br>mg <sub>Pd</sub> <sup>-1</sup> |
|----------------|-----------|-----------|------------------------------------------------------------------------|----------------------------------|-----------------------------------------|---------------------------------------|--------------------------------------------------------|
| Pd/C/GC        | -0.30     | -0.09     | 1.59/735                                                               | 41.5                             | 0.075                                   | 0.002                                 | 525.5                                                  |
| Au@PdAg-NTs/GC | -0.40     | -0.07     | 3.50/1554                                                              | 28.7                             | 0.275                                   | 0.004                                 | 443.8                                                  |

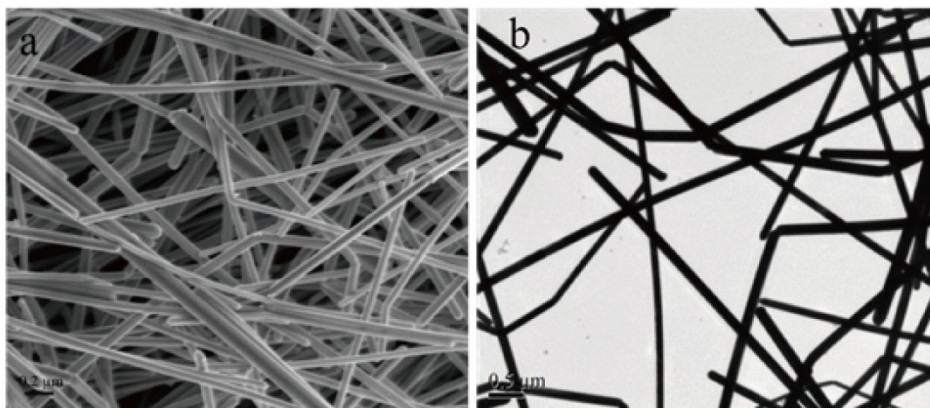

**Fig. S1** (a) SEM and (b) TEM images of Ag nanowires.

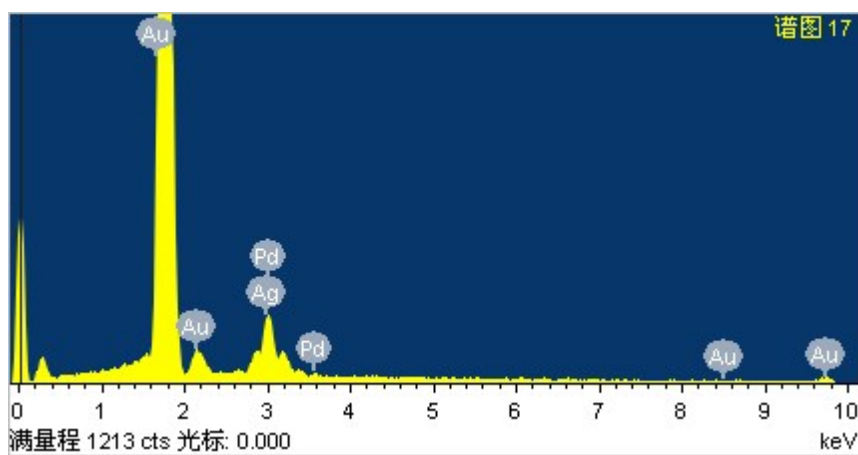

**Fig. S2** EDS spectrum of Au@PdAg-NTs on a Si substrate.

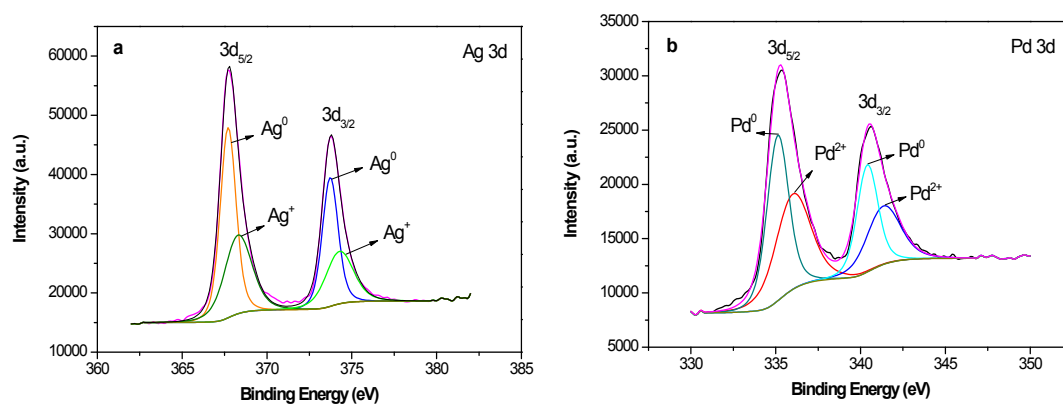

**Fig. S3** (a) Ag 3d and (b) Pd 3d XPS spectra of Au@PdAg-NTs. Peaks were deconvoluted to reflect different contributions.
